# Supplementary material for: The rapid formation of functional monolayers on silicon under mild conditions
Source: Royal Society of Chemistry journal article supplement (doi:10.1039/c4cp00396a), 2014-01-01
Supplement: c4cp00396a1.pdf [file c4cp00396a1.pdf]

Electronic Supplementary Information for

**The Rapid Formation of Functional Monolayers on Silicon Under Mild Conditions**

Simone Ciampi,<sup>a,†</sup> Erwann Luais,<sup>a,‡</sup> Michael James,<sup>b</sup> Moinul H. Choudhury,<sup>a</sup> Nadim Darwish<sup>a</sup> and J. Justin Gooding<sup>\*a</sup>

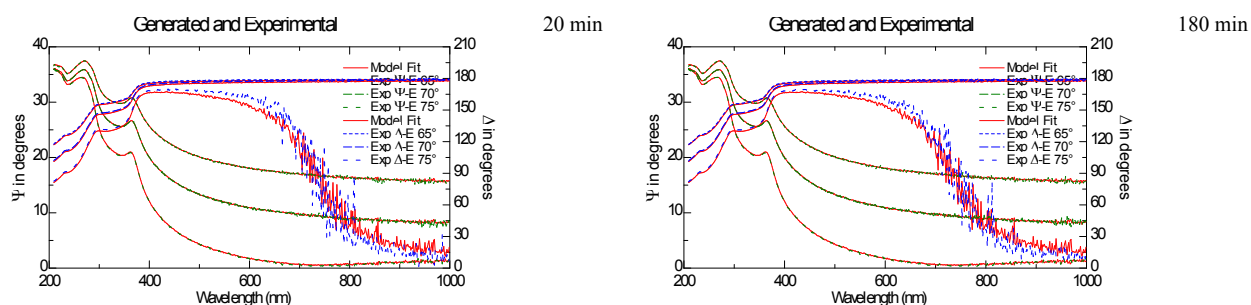

**Figure S1.** Representative experimental  $\Psi$  and  $\Delta$  data and best-fit models (—) for spectroscopic ellipsometry measurements for the attempted grafting of DEB from dichloromethane (DCM) solutions (substrate: phosphorous-doped, 8-12  $\Omega$  cm, Si(100)–H). Reaction times are indicated in figure. The incidence angles were 65, 70 and 75° (graphs from top toward bottom). Ellipsometry determines the complex reflectance ratio  $\rho = r_s / r_p = \tan \Psi \exp(i\Delta)$ , where  $r_p$  and  $r_s$  are the Fresnel reflection coefficients for light polarized parallel and perpendicular to the plane of incidence, respectively. The angle  $\Psi$  is the ratio of the changes in amplitude for the s and p polarizations after reflection. The angle  $\Delta$  relates to the difference in the phase shift after reflection for the two polarizations. Refinement using the Cauchy approximation (see §2.2.2 in main text) indicated no DEB monolayer formed from a 5 mM DEB solution in DCM in the dark and at room temperature.

**XPS analysis of the fractional surface coverage of surface silicon atoms by DEB molecules in the monolayer**

Fractional ML coverage can be extracted from XPS data according to the model of Cicero et al:

$$\frac{N_{ML}}{N_{Si}} = \frac{\lambda_{Si,Si} d_{ML} I_C / SF_C \rho_{Si} \exp[-d_{ML} / (\lambda_{Si,ML} \sin(\theta))]}{\lambda_{C,ML} N_C I_{Si} / SF_{Si} N_{Si} 1 - \exp[d_{ML} / (\lambda_{C,ML} \sin(\theta))]}$$

where  $d_{ML}$  is the monolayer thickness obtained from XRR,  $N_C$  is the number of carbon atoms in the molecule,  $\lambda_{\alpha,\beta}$  is the inelastic mean free path of electrons emitted from  $\alpha$  travelling through  $\beta$  ( $\lambda_{Si,Si} = 16 \text{ \AA}$ ,  $\lambda_{C,ML} = 36 \text{ \AA}$ ,  $\lambda_{Si,ML} = 41.5 \text{ \AA}$ ),<sup>1</sup>  $I_\alpha$  and  $SF_\alpha$  are, respectively, the photoelectron counts and the instrument-specific sensitivity factor for the element  $\alpha$ ,  $\rho_{Si}$  is the Si atoms per unit of volume ( $0.05 \text{ \AA}^{-3}$ ),  $N_{Si}$  is the number density of atoms for the Si(100) surface ( $0.068 \text{ \AA}^{-2}$ ),  $\theta$  is the takeoff angle between the surface and the analyzer ( $90^\circ$  in our case).

S2

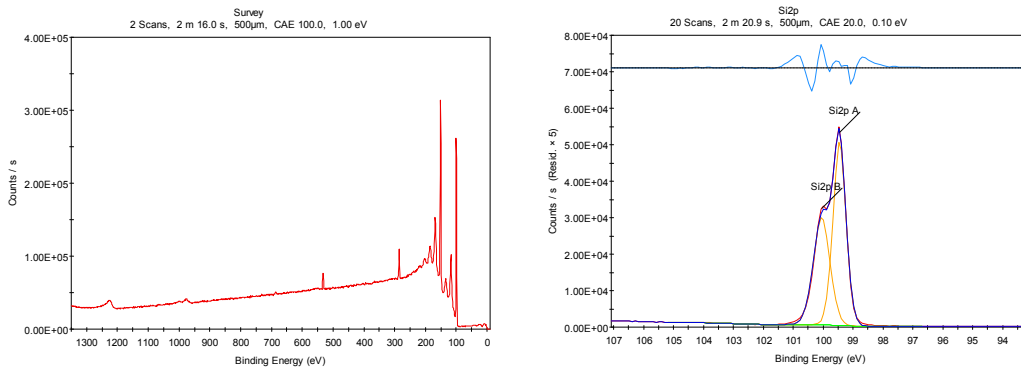

Figure S2. Representative survey and Si 2p high-resolution XPS spectrographs for freshly etched Si(100)-H samples (phosphorous-doped, 8-12 Ω cm). The average C/Si ratio was  $0.12 \pm 0.02$

S3

a)

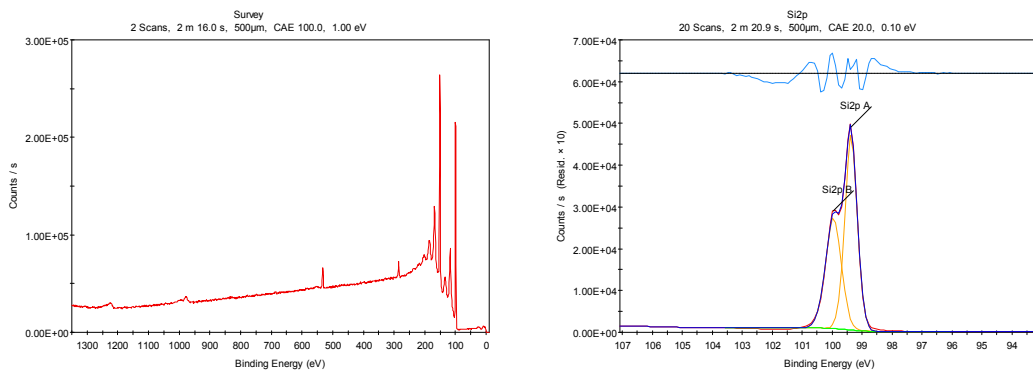

b)

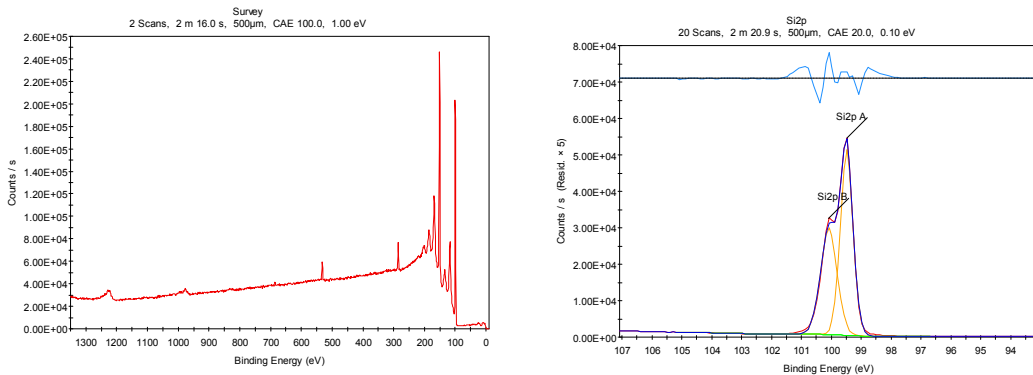

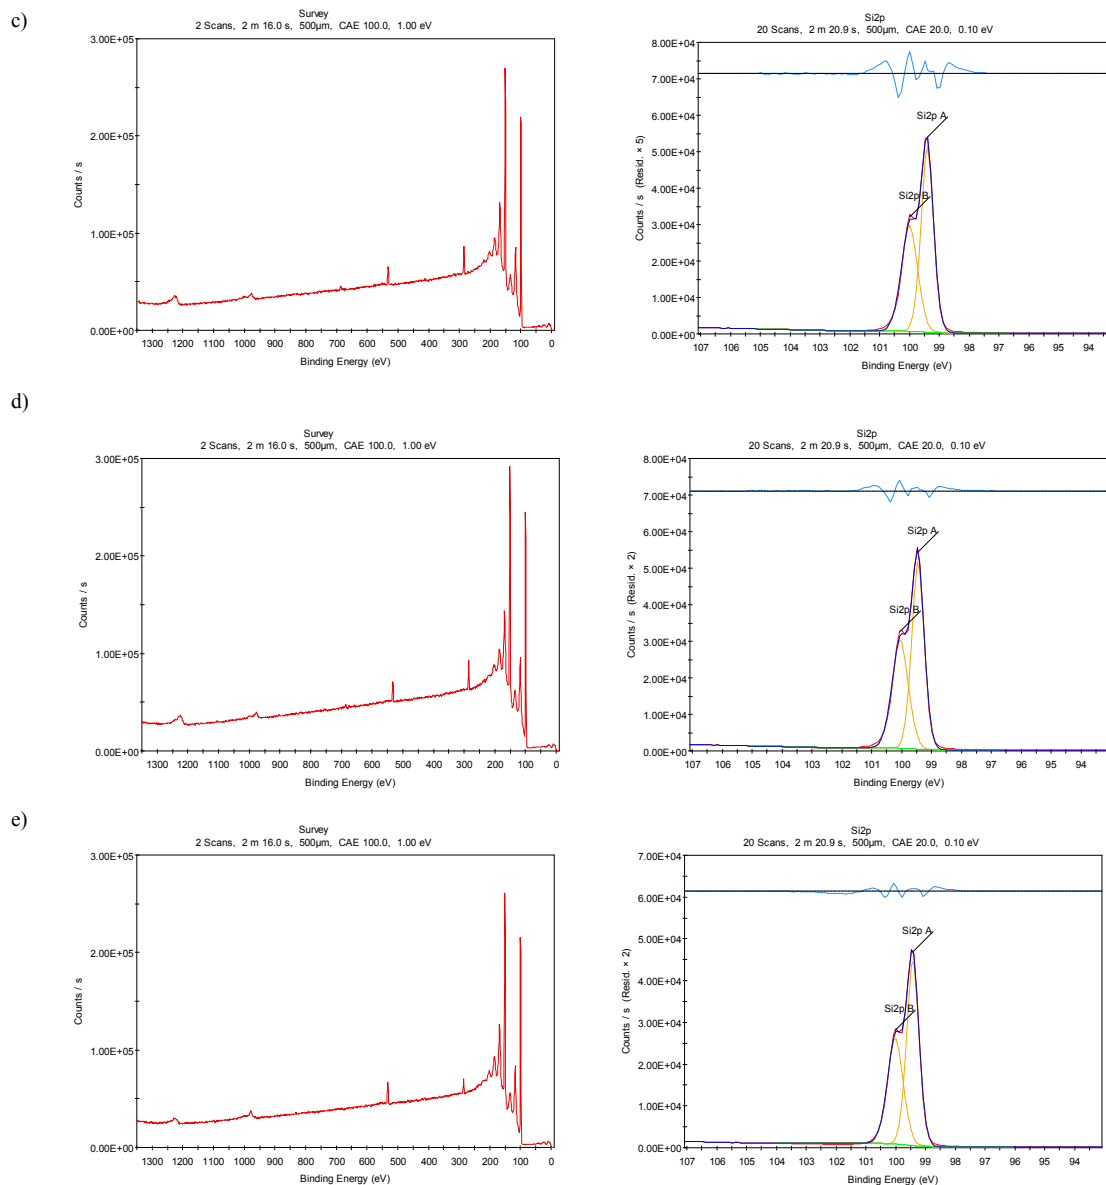

**Figure S3.** Representative survey and Si 2p high-resolution XPS spectrographs for the attempts to graft DEB from: dichloromethane solutions (substrate: phosphorous-doped, 8-12  $\Omega$  cm, Si(100)-H). Reaction times were: ((a), 20 min), ((b), 30 min), ((c), 60 min), ((d), 120 min), ((e), 180 min). Monolayer d values estimated from the attenuation of the substrate Si signal (see footnote 30 in the main text) were equal to 0 nm for all reaction times. No evidence of monolayer formation is found for the DEB/DCM system.

S4

a)

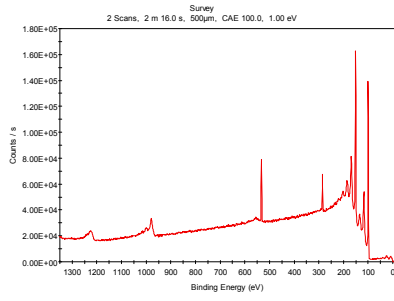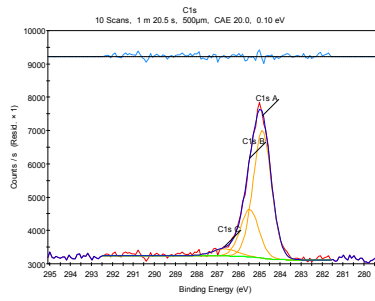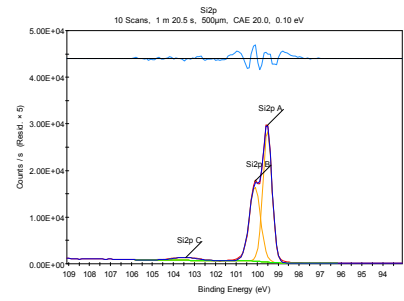

b)

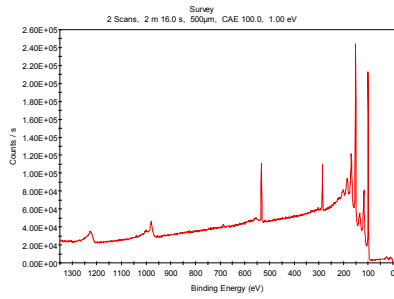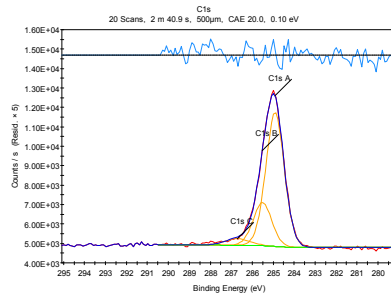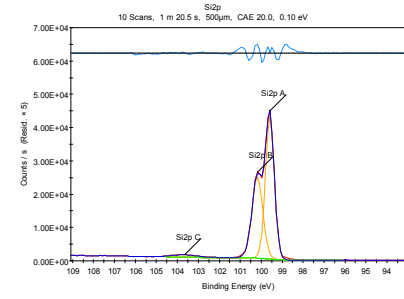

c)

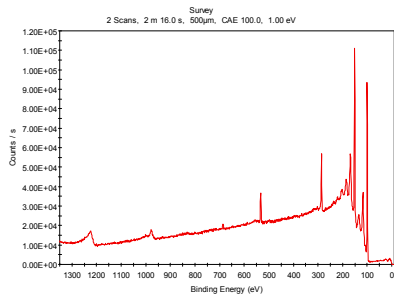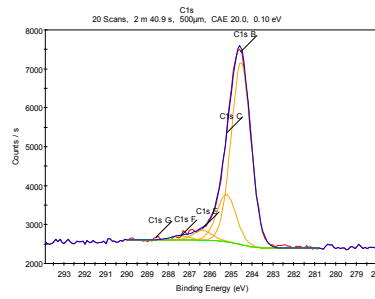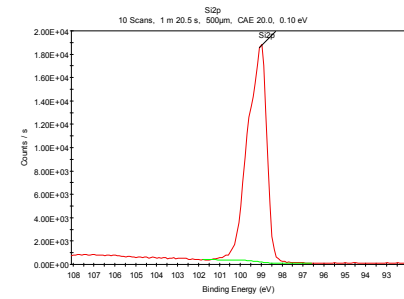

d)

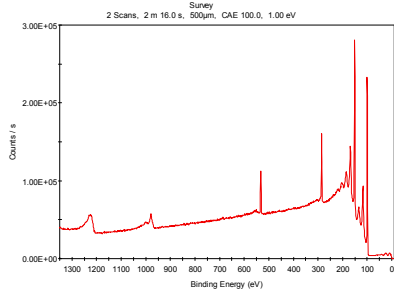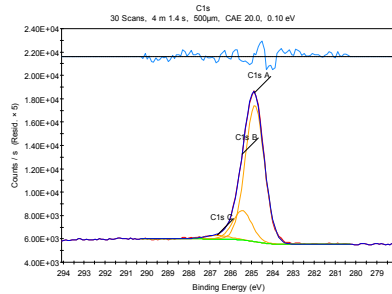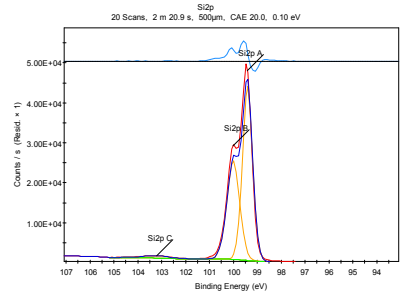

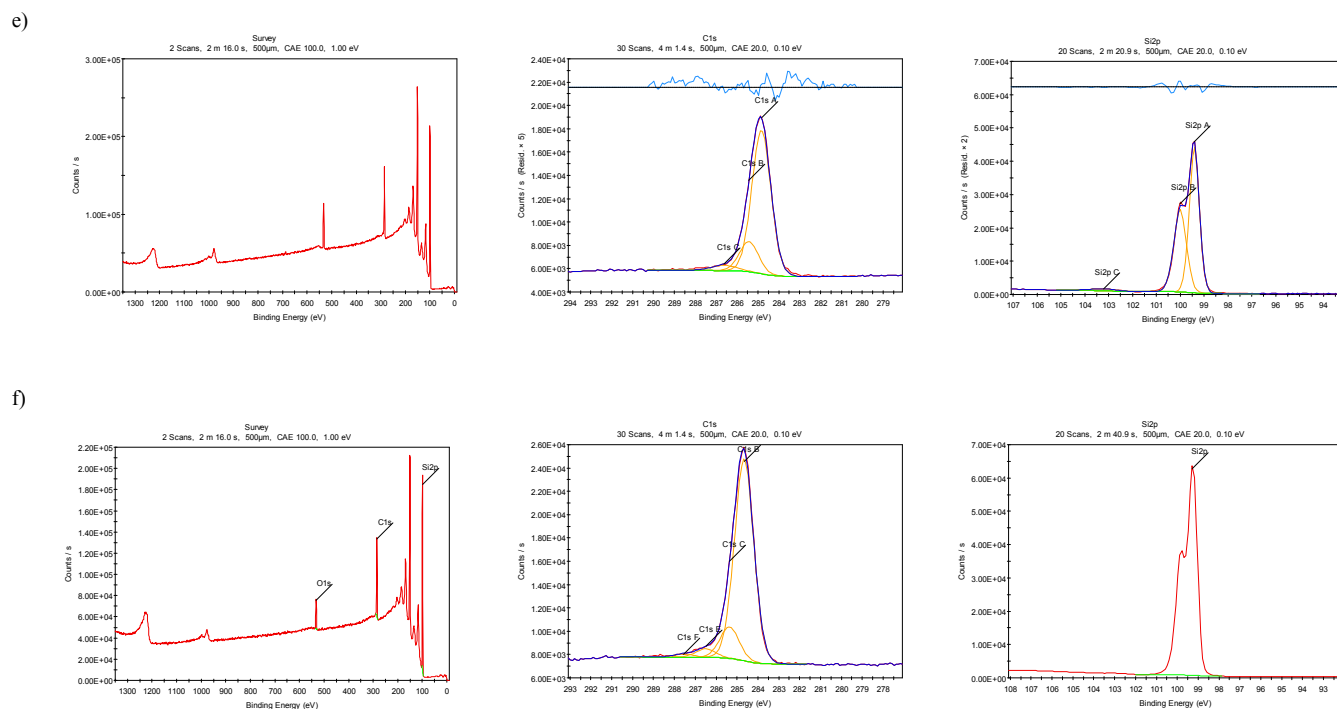

**Figure S4.** Representative survey, C 1s and Si 2p high-resolution XPS spectrographs for the grafting of DEB from acetonitrile solutions (substrate: phosphorous-doped, 8-12  $\Omega$  cm, Si(100)-H). Reaction times were: ((a), 10 min), ((b), 20 min), ((c), 30 min), ((d), 60 min), ((e), 120 min), ((f), 180 min). Average atomic C/Si ratios were: 0.19 (a, 10 min), 0.22 (b, 20 min), 0.30 (c, 30 min), 0.33 (d, 60 min), 0.36 (e, 120 min) and 0.40 (f, 180 min). Values of film thickness, as estimated from the attenuation of the substrate Si 2p signal (see footnote 30 in the main text) were: 0.6 nm (a), 0.7 nm (b), 0.8 nm (c), 1.0 nm (d), 1.1 nm (e), 1.1 nm (f). The high-resolution C 1s signal was generally fitted with three component peaks; the major component at 285.0 eV (76%, 1.0 eV fwhm) is assigned to the methylene carbons of the adsorbate.<sup>2</sup> The binding energy component at 285.6 eV (19%, 1.0 eV fwhm) and the higher binding energy component at 286.8 eV (5%, 1.4 eV fwhm) are tentatively assigned to an asymmetry in the main peak,<sup>3</sup> and to either oxygen-bound carbon atoms (C-O),<sup>4</sup> or sp-hybridized carbon-bound carbon, respectively.<sup>5</sup> On hydrogenated silicon surfaces, the assembly of monolayers of 1-alkynes is likely to result in sp<sup>2</sup> hybridization at the surface.<sup>6</sup> The growth of sp<sup>2</sup> structures is kinetically more facile than that of sp<sup>3</sup> structures (*i.e.*, 1-alkene adsorbates),<sup>6-8</sup> possibly by a factor of up to 6:1.<sup>9</sup> XPS data does support the existence of some oxidized carbon in the film, and this is in line with entropic considerations.<sup>10</sup> The C 1s peak decomposition may indicate that a non-negligible number of C-O bonds exist in monolayers of DEB. The structure of the adventitious C-O bond is still highly debated, although contamination has been reported in several studies.<sup>2-4, 10</sup> For instance, Kramer and co-workers suggests that a shift from 285 to 286.5 eV is likely to be associated to the core ionization of monohydroxyl carbon atoms ( $-\text{Si}-\text{CHC}(\text{OH})-$ ).<sup>3</sup> Zuilhof and co-workers have more recently suggested that the emission at 286.5 eV may also include emissions from  $-\text{C}\equiv\text{C}-$  groups.<sup>5</sup>

S5

a)

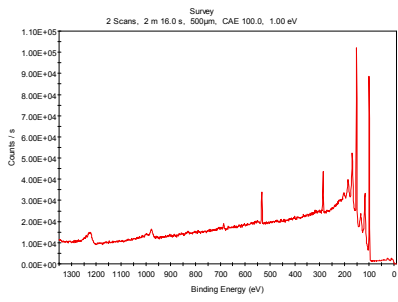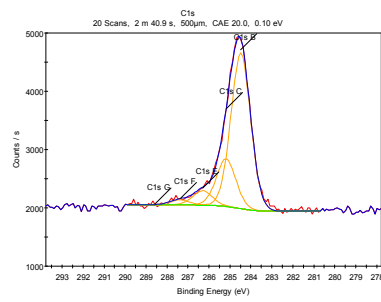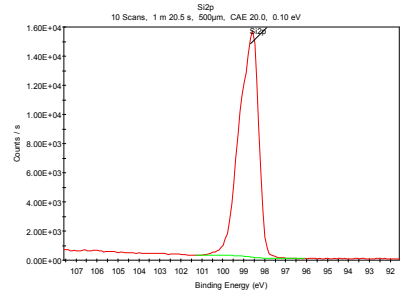

b)

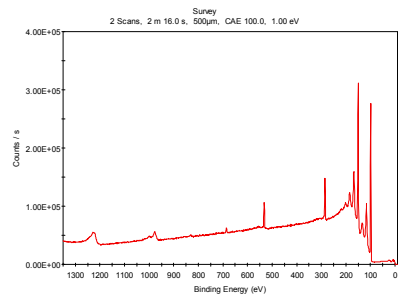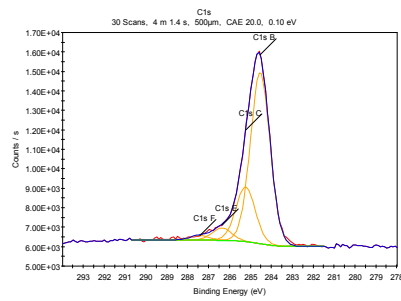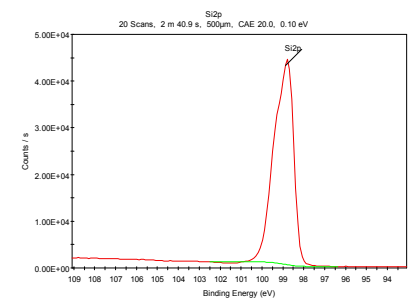

c)

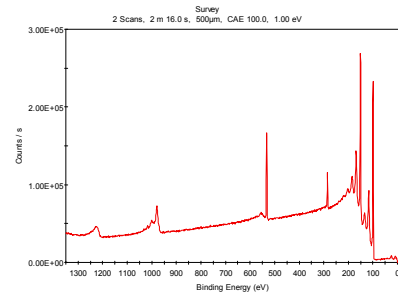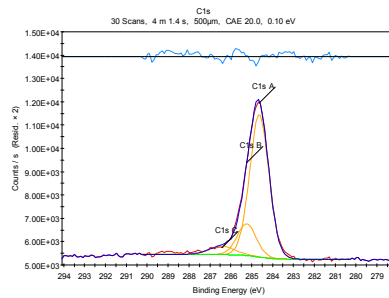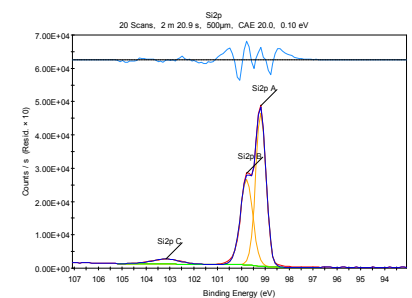

d)

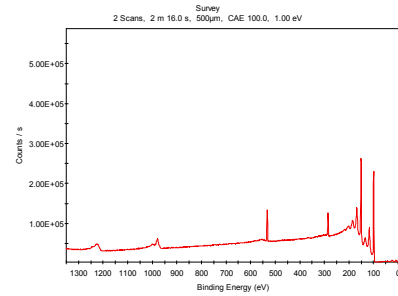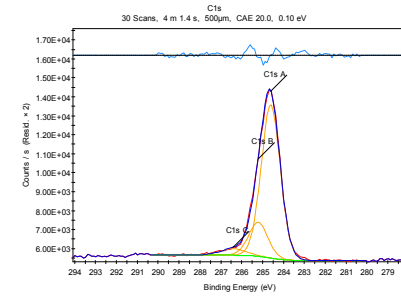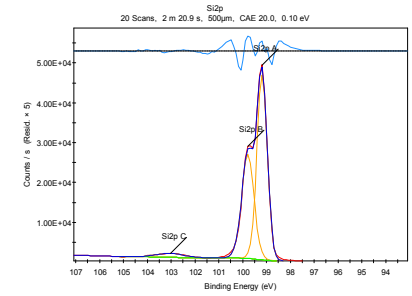

e)

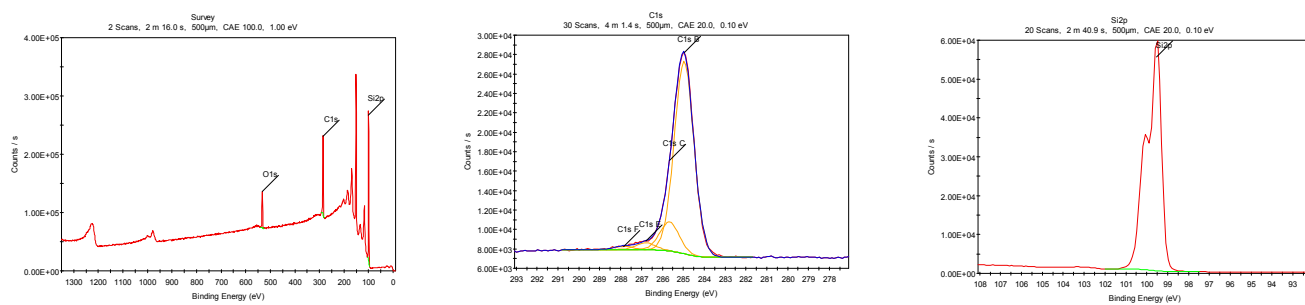

f)

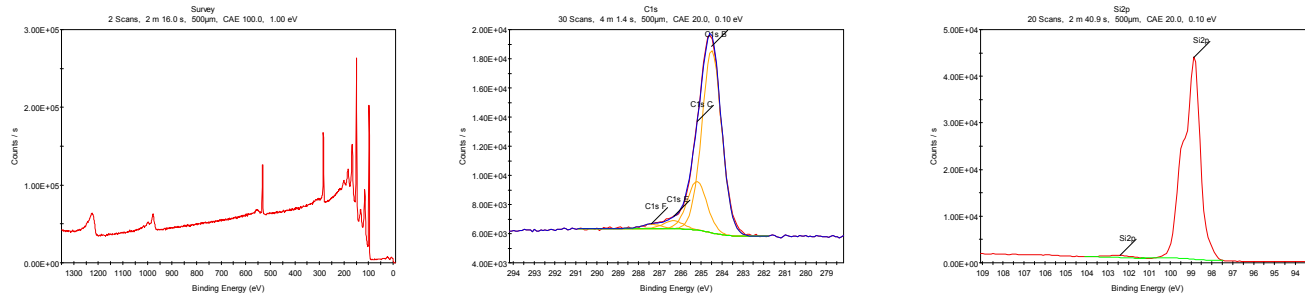

**Figure S5.** Representative survey, C 1s and Si 2p high-resolution XPS spectrographs for the grafting of DEB from acetonitrile solutions (substrate: boron-doped, 10-20  $\Omega$  cm, Si(100)-H). Reaction times were: ((a), 10 min), ((b), 20 min), ((c), 30 min), ((d), 60 min), ((e), 120 min), ((f), 180 min). Average atomic C/Si ratios were: 0.22 (a, 10 min), 0.25 (b, 20 min), 0.18 (c, 30 min), 0.23 (d, 60 min), 0.43 (e, 120 min) and 0.36 (f, 180 min). Values of film thickness, as estimated from the attenuation of the substrate Si 2p signal (see footnote 30 in the main text) were: 0.5 nm (a), 0.6 nm (b), 0.7 nm (c), 0.8 nm (d), 0.9 nm (e), 1.0 nm (f).

S6

**d**            **9.70(7) Å**  
**SLD**         **$13.6 \times 10^{-6} \text{ Å}^{-2}$**   
**Roughness**   **5.5(10) Å**

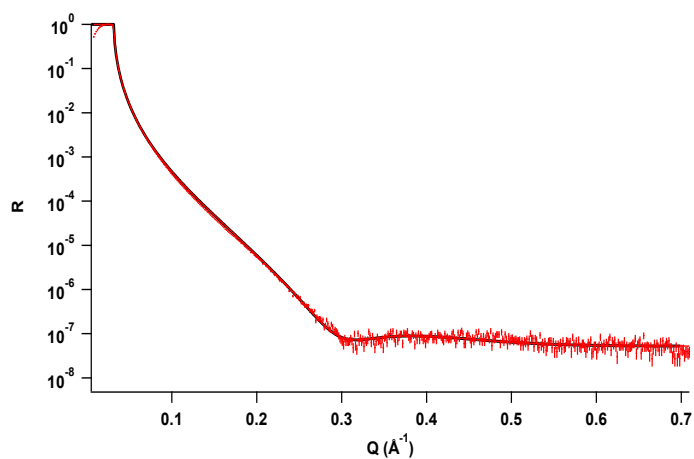

**Figure S6.** Measured and refined (—) XRR profiles for DEB films on n-type Si(100) surfaces. Reaction time was 120 min. The refined value of scattering length density, is  $13.6 \times 10^{-6} \text{ Å}^{-2}$ . The XRR-determined film thickness is 9.7(7) Å.

S7



a)

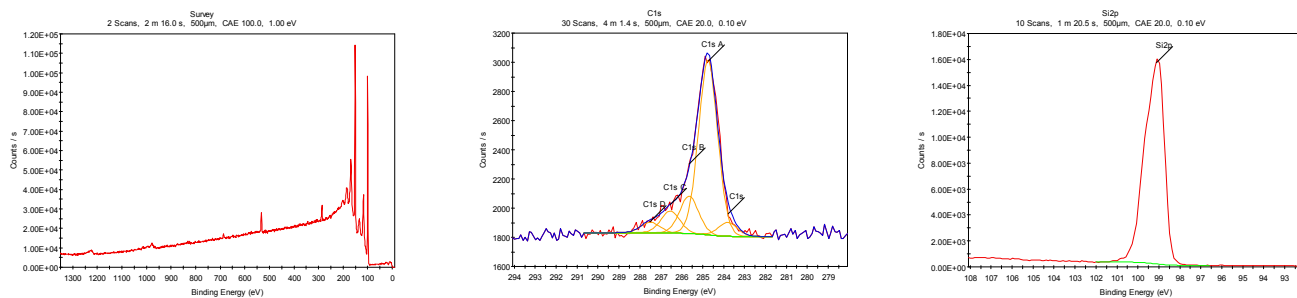

b)

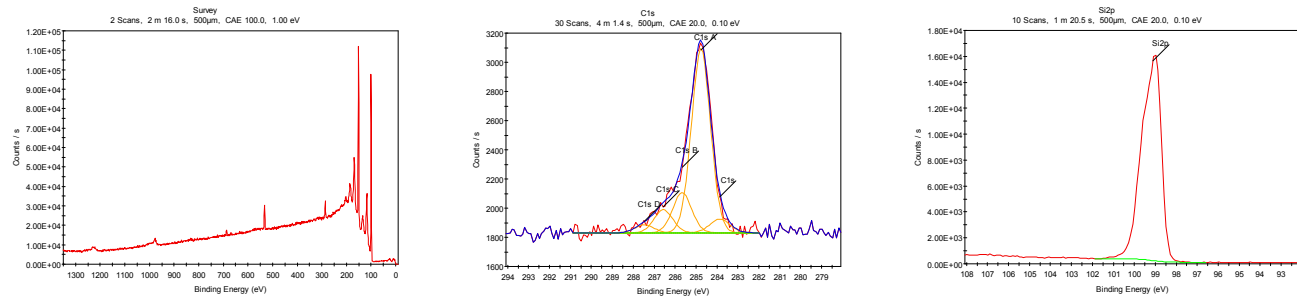

c)

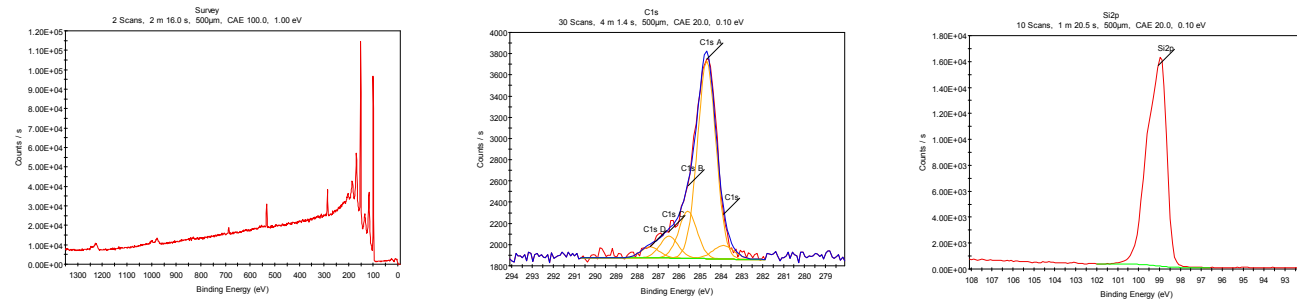

d)

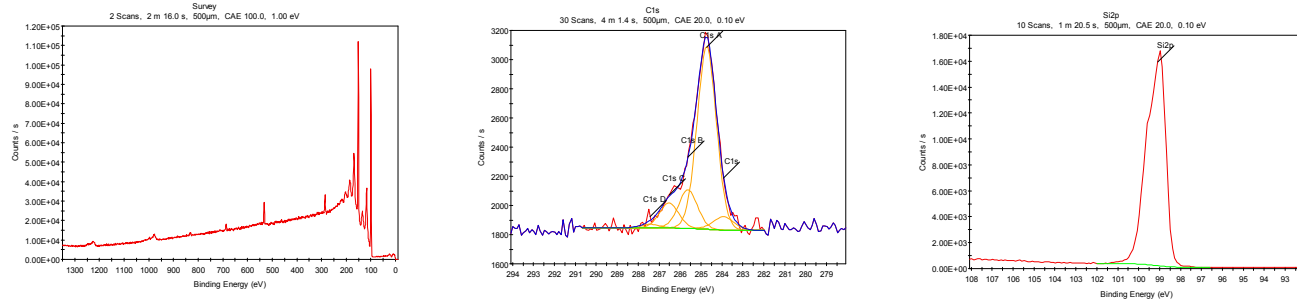

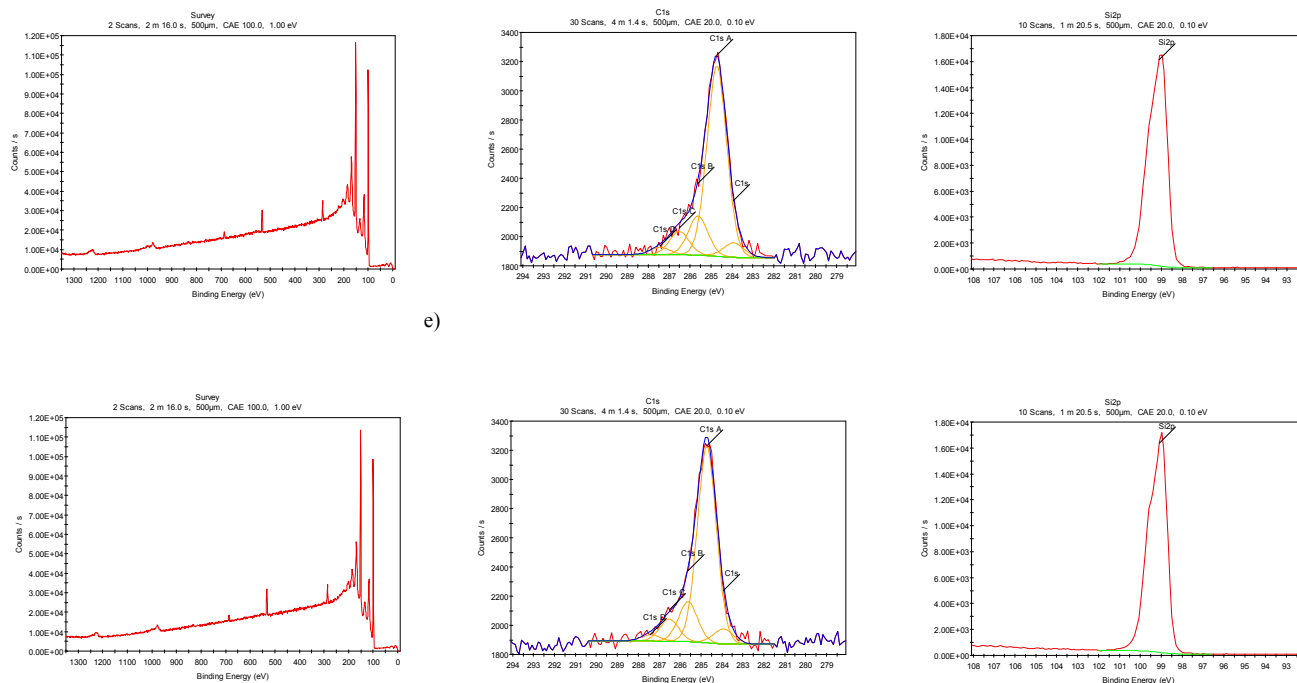

**Figure S7.** Representative survey, C 1s and Si 2p high-resolution XPS spectrographs for the attempts to graft 1,8-nonadiyne from: acetonitrile solutions (substrate: phosphorous-doped, 8-12  $\Omega$  cm, Si(100)-H). Reaction times were: ((a), 10 min), ((b), 20 min), ((c), 30 min), ((d), 60 min), ((e), 120 min), ((f), 180 min). Atomic C/Si ratios were: 0.09 (a, 10 min), 0.10 (b, 20 min), 0.14 (c, 30 min), 0.10 (d, 60 min), 0.10 (e, 120 min) and 0.10 (f, 180 min). Values of film thickness, as estimated from the attenuation of the substrate Si 2p signal (see footnote 30 in the main text) were 0 nm for all reaction times.

S8

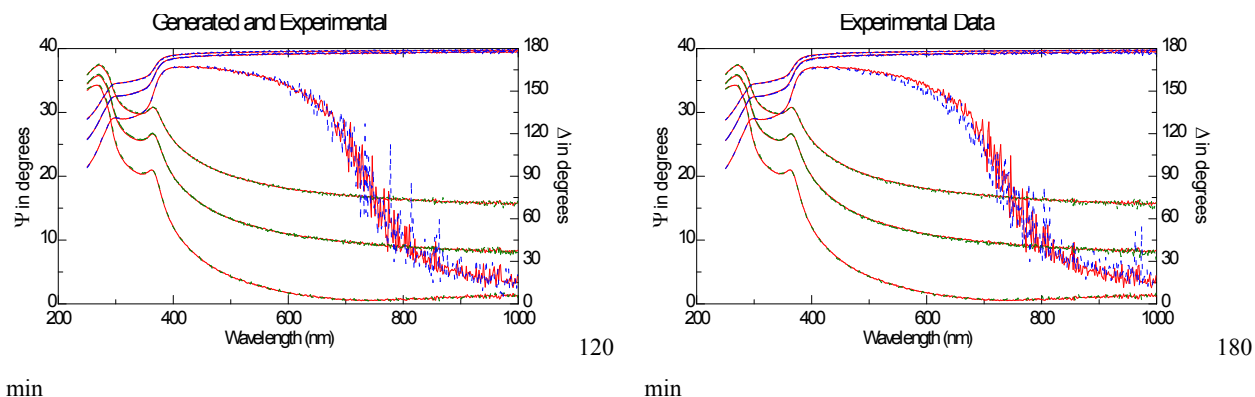

**Figure S8.** Representative experimental  $\Psi$  and  $\Delta$  data and best-fit models (—) for spectroscopic ellipsometry measurements for the attempted grafting of DEB from THF solutions (substrate: phosphorous-doped, 8-12  $\Omega$  cm, Si(100)-H). Reaction times are indicated in figure. Cauchy approximation (see §2.2.2 in main text) indicated no monolayer was formed from a 5 mM 1,8-nonadiyne solution in THF in the dark and at room temperature.

## References

1. R. L. Cicero, M. R. Linford and C. E. D. Chidsey, *Langmuir* 2000, **16**, 5688-5695.
2. X. Wallart, C. H. de Villeneuve and P. Allongue, *J. Am. Chem. Soc.*, 2005, **127**, 7871-7878.
3. M. Kondo, T. E. Mates, D. A. Fischer, F. Wudl and E. J. Kramer, *Langmuir*, 2010, **26**, 17000-17012.
4. L. Scheres, A. Arafat and H. Zuilhof, *Langmuir*, 2007, **23**, 8343-8346.
5. B. Rijksen, S. P. Pujari, L. Scheres, C. J. M. van Rijn, J. E. Baio, T. Weidner and H. Zuilhof, *Langmuir*, 2012, **28**, 6577-6588.
6. M. A. Walsh, S. R. Walter, K. H. Bevan, F. M. Geiger and M. C. Hersam, *J. Am. Chem. Soc.*, 2010, **132**, 3013-3019.
7. A. Ng, S. Ciampi, M. James, J. B. Harper and J. J. Gooding, *Langmuir*, 2009, **25**, 13934-13941.
8. J.-H. Lee, J.-H. Choi and J.-H. Cho, *J. Phys. Chem. C*, 2011, **115**, 14942-14946.
9. B. Rijksen, B. van Lagen and H. Zuilhof, *J. Am. Chem. Soc.*, 2011, **133**, 4998-5008.
10. G. F. Cerofolini, C. Galati, S. Reina and L. Renna, *Surf. Interface Anal.*, 2006, **38**, 126-138.
